# Supplementary material
Source: publisher figshare collection journal article supplement (https://tandf.figshare.com/ndownloader/files/22136037)
Supplement: Supplementary file 1 [file 22136037]

**Supplemental Methods, Figures and References**

***Materials***

Unless otherwise noted, reagents were obtained from ThermoFisher (Hillsboro, OR) or Sigma Aldrich (Saint Louis, MO). The human stem cell lines, WOA9 (hESC) and IMR90-4 (hiPSC), were obtained from WiCell (Madison, WI). The Y6 hiPSC line was obtained from the Yale Stem Cell Center. Antibodies are described in Supplemental Table 1. IRDye 680RD Bone Tag was obtained from LiCor Biosciences (Lincoln, NE). Chondroitin sulfate, >90%, was obtained from Alfa Aesar, Ward Hill, MA (USA), gelatin type A from fish skin from J.T. Baker (Phillipsburg, NJ), and hyaluronic acid (50,000-70,000 kDa) from Calbiochem/Millipore (San Diego, CA). Ammonium persulfate, OTC compound, and 4,6-diamidino-2-phenylindole (DAPI) were obtained from Thermo-Fisher Scientifics (Fair Lawn, NJ) and glutaraldehyde, 50%, from Merck (Solon, OH). Tri-Buffer-saline with 1% Tween 20, phosphate buffer saline (PBS) (pH 7.4, 1.4M NaCl, 0.1M phosphate, 0.03M KCL), and TEMED were purchased from American BIO (Natick, MA).

**Supplemental Table 1: Antibodies**

| **Antigen** | **Host** | **Dilutiona** | **Conjugate** | **Supplier** |
| --- | --- | --- | --- | --- |
| APOE | Rabbit oligoclonal | 1:200 | None (Primary) | Thermo Fisher Scientific |
| TIMP3 | Goat polyclonal | 1:200 | None (Primary) | R&D Systems |
| Vitronectin | Rabbit polyclonal | 1:100 | None (Primary) | R&D Systems |
| Rabbit IgG | Donkey | 1:250 | Cy3 | Jackson ImmunoResearch |
| Rabbit IgG | Donkey | 1:250 | Cy5 | Jackson ImmunoResearch |
| Goat IgG | Donkey | 1:250 | Cy3 | Jackson ImmunoResearch |

***Synthesis of the scaffold***

The scaffold was synthesized as described previously.1. Briefly, gelatin (500mg), chondroitin sulfate (250mg) and hyaluronic acid (500mg) were dissolved in 10 ml double-distilled, degassed water and cross-linked with 20 L ammonium persulfate (25 mg/ml), 20 L tetramethylethylenediamine, and 50 L glutaraldehyde, 0.5%. The solution was frozen in a 5-ml syringe barrel at -20 °C for 16-18 hrs, and vacuum dried in a lyophilizer. The 3D scaffold monolith (GCH) was embedded in OCT and sectioned at -25°C to create 60 µm thick planar sheets with a 1.0 cm-diameter. The sheets were sterilized in a series of graded alcohols (20% to 80%) and stored at 4ºC.

***Differentiation of RPC and RPE.***

Stem cell lines were maintained and differentiated by adapting previously described methods 1-3. Briefly, RPC were differentiated by dissociating the stem cells with 1 U/ml dispase, suspended in mTeSR-1 (Stemcell technologies, BC, CA) that included 10 µm blebbistatin and 5 mM rock inhibitor, and cultured in low-attachment six-well plates (Corning, NY) to generate embryoid bodies at day 0 (D0). The next day, mTeSR-1 was gradually exchanged for neural induction medium (NIM) medium: 50% Dulbecco’s modified Eagle’s medium, high glucose (DMEM)/50% F-12 nutrient medium (Gibco/Life technologies, Grand Island, NY) supplemented with 15% knockout serum (Invitrogen/Thermo-Fischer, Waltham, MA), 0.1mM 2-mercaptoethanol (Sigma-Aldrich), 1% N2 supplement, 1 mM glutamax, 0.1 M nonessential amino acids (Invitrogen), 50 U/ml penicillin, and 50µg/ml streptomycin. The ratio of mTeSR-1/NIM was 3:1 on D1, 1:1 on D2, and complete NIM from D3 to D7. On D7, embryoid bodies were seeded on Matrigel coated 6-well plates and cultured in NIM until D21. On D21, retinal vesicles were picked and cultured in suspension in serum free medium (SFM) comprised of 70% DMEM (high glucose) and 30% F-12 containing 2% B27 and penicillin/streptomycin. For experiments, retinal cups comprised of RPCs were dissociated using papain (Worthington Biochemical Corp, Lakewood, NJ) according to the manufacturers protocol. Dissociated cells were seeded onto the scaffold.

RPE was derived from IMR90-4 cells, using previously described methods.4, 5 Briefly, embryoid bodies were cultured as floating clusters in knockout serum replacement medium (KSR), composed of DMEM/F12 (1:1) medium, 14% knockout serum replacement, 1% nonessential amino acids, 2 mM glutamine, 50 U/ml penicillin, 50 μg/ml streptomycin, and 10 mM nicotinamide in ultra-low-attachment cluster plates (Costar, Corning) for 1 week. The embryoid bodies were plated on laminin-coated culture dishes (10 μg/ml) for 6 weeks. During the third and fourth weeks, KSR was supplemented with 140 ng/ml activin A (Peprotech, Rocky Hill, NJ). After the sixth week, pigmented epithelial cells were isolated by trypsinization and expanded on laminin-coated dishes. Cultures were purified by weeding unpigmented cells before reseeding them on Transwell culture inserts (1.12 cm2 growth area, 0.4 μm pores) that were coated with 10 μg Synthemax. The plating density was 5 × 105 cells per Transwell insert. The reseeded cultures were maintained in KSR for 5 weeks. The KSR was then replaced and adapted to SFM for 4 weeks. The cells re-pigmented and the transepithelial electrical resistance (TER) increased to >250 Ω×cm2. TER was monitored using Endohm electrodes (World Precision Instruments, Sarasota, FL).

Co-culture was initiated one week after plating RPC on the scaffold by layering the RPC cultures cell-side down onto differentiated RPE (Fig. S1). Culture medium was changed every other day for six months. Cells with photoreceptor markers were found at the RPE-facing surface, and with ganglion cell markers near the scaffold.


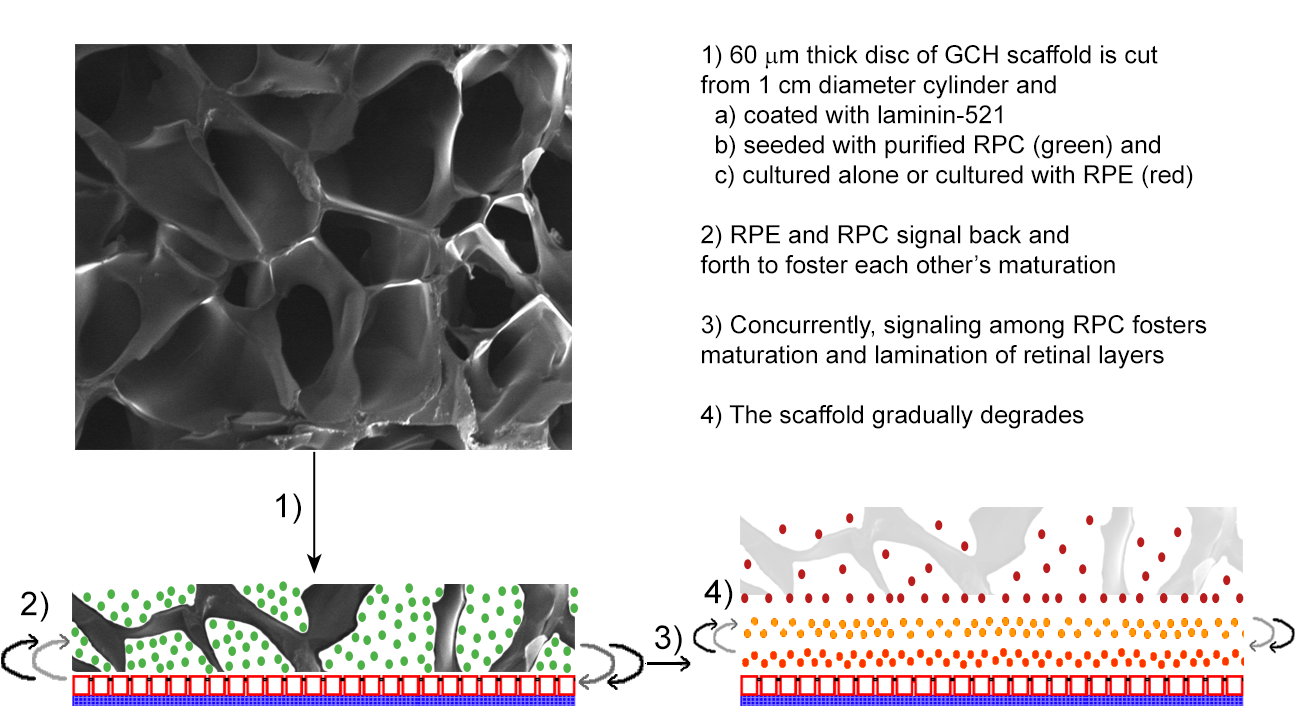


B


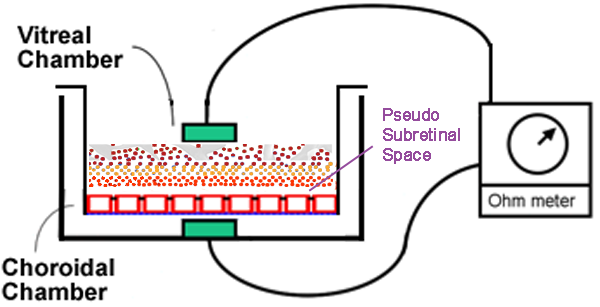


**Figure S1. RPC culture and RPC/RPE co-culture. Related to Experimental procedures: RPE and co-culture.** A) Experimental scheme. Co-culture with RPE is shown, and initial experiments were conducted with RPC alone. B) Method for measuring transepithelial resistance. RPE is cultured on Transwell inserts, and the RPC culture is layered on top. Following maturation, the resistance is measured using EndOhm electrodes. Modified with permission: Fields et al., 2019 Prog. Retinal Eye Res, online ahead of print).

***Immunofluorescence***

Samples were fixed in 4% paraformaldehyde for 5 mins. Samples were used as is for flat mounts or incubated in graded sucrose solutions up to 30%, for cryosections. Cryo-samples were incubated overnight at 4ºC in a 1:1 mixture 30% sucrose and OCT (Fisher Healthcare™, Pittsburg, PA). Sections, 12 µm, were made with a Leica CM1950 cryostat (Buffalo Grove, IL) at -25ºC and mounted on poly-lysine coated slides. Slides were room dried for 48hrs before immunocytochemistry. Flat mounts were permeabilized with 0.1% Triton-X100 in PBS (PBST) Flat mounts and cryo-sections were washed in PBS and blocked with PBST containing 10% donkey serum. The sections were incubated overnight at 4°C with primary antibodies followed by washing 3x 5 min with PBST before a 2 hr incubation at room temperature with secondary antibodies. The samples were counter stained with a 15 min incubation with either: 10 ng/ml DAPI (4,6-diamidino-2-phenylindole) (Invitrogen) to label the cell nucleus, 4.0 U/ml Alexa Fluor 488 phalloidin (Invitrogen), 0.5 μg/ml Nile Red to label neutral lipids, or 0.02 nmol/μl IRdye 680RD Bone Tag to label Ca++. Finally, slides were washed 3 more times with PBS. Fluorescence images were captured with an LSM 410 spinning-disc confocal microscope and processed using Zen software (Carl Zeiss, Inc, Thornwood, NY). Images used are representative of 3 independent experiments, one each for each cell line. An example of a partially differentiated RPC culture is shown in Supplemental Figure S2. A more detailed analysis will be published in Singh et al. 2020 (manuscript in preparation).

***
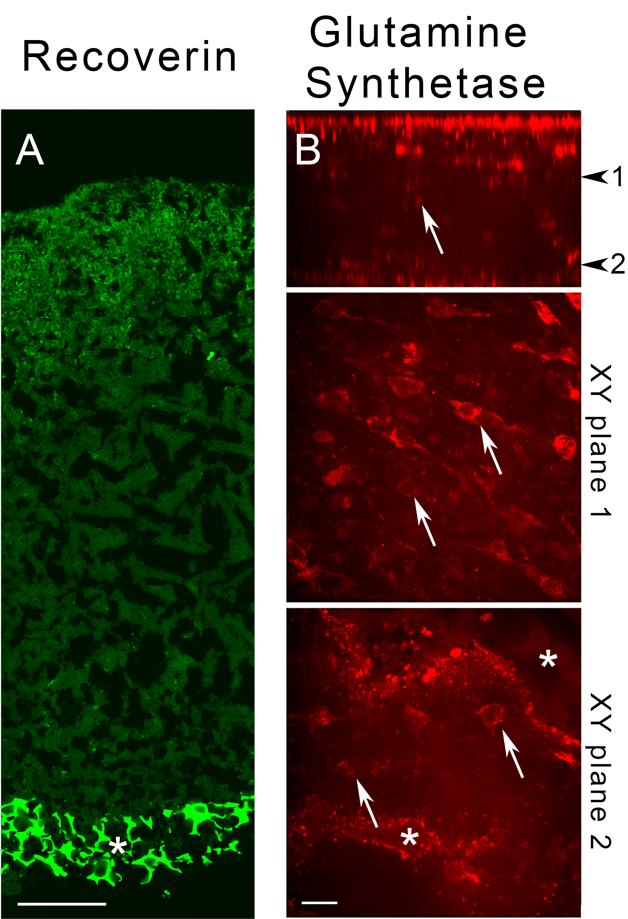
***

**Figure S2.** **Six-month cultures express recoverin-positive cells near the free surface and glutamine synthetase-positive cells throughout the tissue.** A) Frozen sections were fluorescently labeled with antibodies to recoverin. A thick layer of recoverin-positive cells is evident at the top (free surface of the tissue) of the image. The bright signal at the bottom of the section is from the autofluorescent scaffold (marked by the asterisk). Dark spaces between the cells are sectioning artifacts. Scale Bar, 200 µm. B) Whole mounts were fluorescently labeled with antibodies to glutamine synthetase and optically sectioned in a confocal microscope. The top panel is a reconstructed XZ plane. The numbered arrowheads indicate the plane of section for the lower two panels. Arrows point to the position of glutamine synthetase positive cells. Asterisks indicate grazing sections of the autofluorescent scaffold. Note, the bright dots lining the scaffold are artifacts. Scale Bar, 20 µm. A more detailed analysis of these cultures will be published in Singh et al. 2020 (manuscript in preparation).

***Analysis.***

Confocal stacks of images were obtained using an LSM 410 spinning-disc confocal microscope (Carl Zeiss, Inc, Thornwood, NY). The optimal increment of the Z-section stepping-motor was calibrated by a Zeiss technician using spherical beads to correct for distortion by the emission and excitation wave lengths and numerical aperture of the Plan Apochromat 40× oil lens. Accordingly, the thickness of each slice was the optimal for these optics, as determined by Zen software (Carl Zeiss), and there was no overlap between adjacent slices. For each experiment, volume and number of the druse were estimated by capturing images from twenty random fields (30,000 μm2) that were selected by blindly moving the stage in the x-y plane. The z-stacks were imported into Image J software (NIH, Bethesda, MD). A contour map was constructed by manually circumscribing the “druse” in each slice, as revealed by APOE. The area in μm2 was multiplied by 0.28 μm, the thickness of the slice programed for the Z-axis stepping motor, and the volume of the slices were added together. The analyst did not know the identity of the samples. The Student’s t-test was used to compare TER and the numbers and volumes of “drusen”. The size distribution of “druse” was compared using the Mann-Whitney U test for non-parametric data. Because TER varies between preparations, the statistics are provided for technical repeats (n=4) of one representative experiment. More detailed analyses are provided in Singh et al., 2020 (manuscript in preparation). All comparisons of “drusen” were based on three independent experiments, one each for each cell line.

***References***

1. Singh D, Wang SB, Xia T, Tainsh L, Ghiassi-Nejad M, Xu T, Peng S, Adelman RA, Rizzolo LJ. A biodegradable scaffold enhances differentiation of embryonic stem cells into a thick sheet of retinal cells. *Biomaterials* 2018;154:158-168.

2. Sridhar A, Steward MM, Meyer JS. Nonxenogeneic Growth and Retinal Differentiation of Human Induced Pluripotent Stem Cells. *Stem Cells Transl Med* 2013;2:255-264.

3. Zhong X, Gutierrez C, Xue T, Hampton C, Vergara MN, Cao L-H, Peters A, Park TS, Zambidis ET, Meyer JS, et al. Generation of three-dimensional retinal tissue with functional photoreceptors from human iPSCs. *Nat Commun* 2014;5:4047.

4. Peng S, Gan G, Qiu C, Zhong M, An H, Adelman RA, Rizzolo LJ. Engineering a Blood-Retinal Barrier With Human Embryonic Stem Cell-Derived Retinal Pigment Epithelium: Transcriptome and Functional Analysis. *Stem Cells Translational Medicine* 2013;2:534-544.

5. Idelson M, Alper R, Obolensky A, Ben-Shushan E, Hemo I, Yachimovich-Cohen N, Khaner H, Smith Y, Wiser O, Gropp M, et al. Directed differentiation of human embryonic stem cells into functional retinal pigment epithelium cells. *Cell Stem Cell* 2009;5:396-408.
